# Supplementary material
Source: PubMed Central journal article supplement (PMC6151354)
Supplement: NIHMS988506-supplement-1.pdf [file NIHMS988506-supplement-1.pdf]

APPENDIX

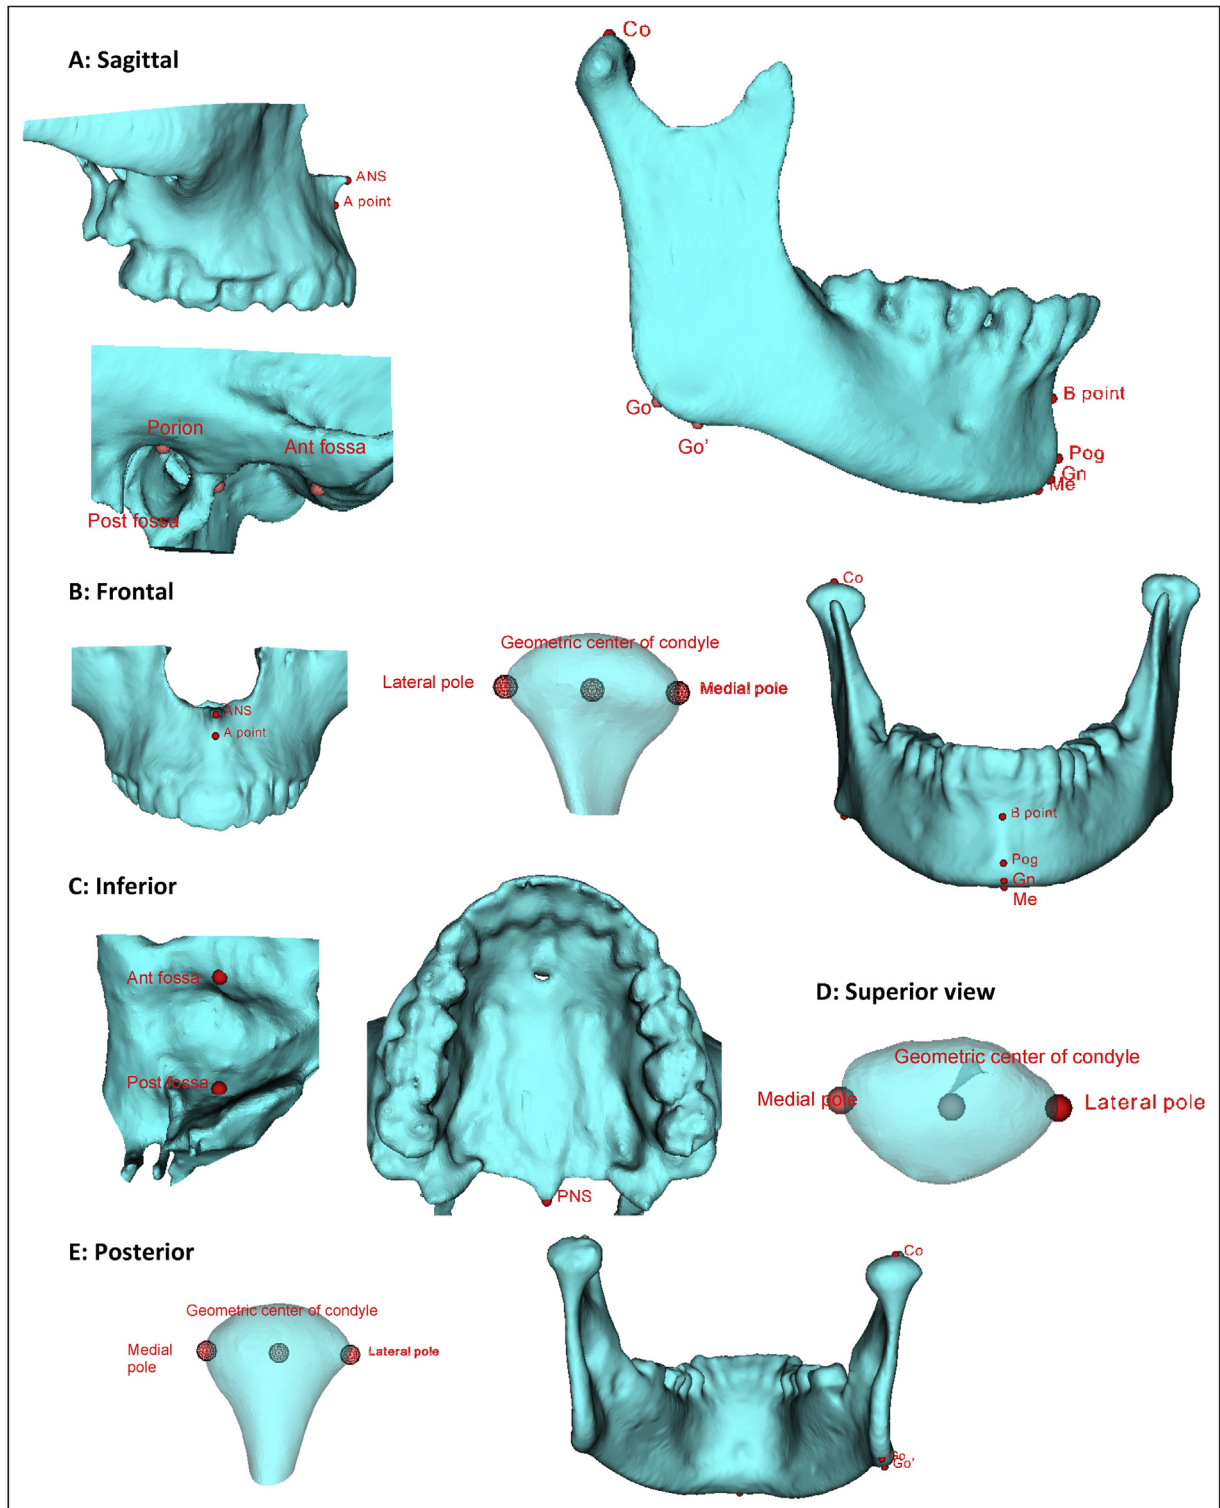

**Supplementary Fig.** Three-dimensional maxillary, mandibular, and glenoid fossa landmark identifications.
